# Supplementary material for: Facile fabrication of AIE/AIEE-active fluorescent nanoparticles based on barbituric for cell imaging applications
Source: Royal Society of Chemistry journal article supplement (doi:10.1039/c7ra03956e), 2017-01-01
Supplement: c7ra03956e1.pdf [file c7ra03956e1.pdf]

## ***Supporting Information***

### **Facile Fabrication of AIE/AIEE -Active Fluorescent Nanoparticles Based on Barbituric for Cell Imaging Applications**

Kai Li<sup>a</sup>, Yang Zhang<sup>b</sup>, Bing Qiao<sup>c</sup>, Furong Tao<sup>a</sup>, Tianduo Li<sup>a</sup>, Yunqiao Ding<sup>a</sup>, Francisco M. Raymo<sup>b</sup>, Yuezhi Cui<sup>\*a</sup>

<sup>a</sup> Shandong Provincial Key Laboratory of Fine Chemicals, Qilu University of Technology, Jinan 250353, P.R. China.

<sup>b</sup> Laboratory for Molecular Photonics, Department of Chemistry, University of Miami, 1301 Memorial Drive, Coral Gables, Florida, 33146-0431, USA.

<sup>c</sup> Laboratory for Molecular Photonics, Department of Physics, University of Miami, 1301 Memorial Drive, Coral Gables, Florida, 33146-0431, USA.

Tel: +86 531 89631208; Fax: +86 531 89631760;

E-mail address: [cyz@qlu.edu.cn](mailto:cyz@qlu.edu.cn)

## Table of contents

|                                                                                                                                                                              |    |
|------------------------------------------------------------------------------------------------------------------------------------------------------------------------------|----|
| 1. <b>Fig. S1</b> NMR Spectra of <b>1a</b> -----                                                                                                                             | 3  |
| 2. <b>Fig. S2</b> FT-IR Spectra of <b>1a</b> -----                                                                                                                           | 3  |
| 3. <b>Fig. S3</b> NMR Spectra of <b>1b</b> -----                                                                                                                             | 4  |
| 4. <b>Fig. S4</b> FT-IR Spectra of <b>1b</b> -----                                                                                                                           | 4  |
| 5. <b>Fig. S5.</b> NMR Spectra of <b>1</b> -----                                                                                                                             | 5  |
| 6. <b>Fig. S6.</b> FT-IR Spectra of <b>1</b> -----                                                                                                                           | 5  |
| 7. <b>Fig. S7.</b> NMR Spectra of <b>2</b> -----                                                                                                                             | 6  |
| 8. <b>Fig. S8.</b> FT-IR Spectra of <b>2</b> -----                                                                                                                           | 6  |
| 9. <b>Fig. S9.</b> ESIMS of <b>2</b> -----                                                                                                                                   | 6  |
| 10. <b>Fig. S10.</b> FT-IR Spectra of <b>3</b> -----                                                                                                                         | 7  |
| 11. <b>Fig. S11.</b> NMR Spectra of <b>3</b> -----                                                                                                                           | 7  |
| 12. <b>Fig. S12.</b> ESIMS of <b>3</b> -----                                                                                                                                 | 7  |
| 13. <b>Fig. S13.</b> NMR Spectra of <b>4</b> -----                                                                                                                           | 7  |
| 14. <b>Fig. S14.</b> FT-IR Spectra of <b>4</b> -----                                                                                                                         | 8  |
| 15. <b>Fig. S15.</b> ESIMS of <b>4</b> -----                                                                                                                                 | 8  |
| 16. <b>Fig. S16.</b> Normalised emission spectra of compounds <b>1-4</b> in THF and THF/water mixture, 24 $\mu$ M concentration, room temperature, water fraction (V%) ----- | 9  |
| 17. <b>Fig. S17.</b> Optimized geometric structures of a) <b>1</b> , b) <b>2</b> , c) <b>3</b> and d) <b>4</b> -----<br>-----                                                | 10 |
| 18. <b>Fig. S18.</b> The time scanning spectra of Compound <b>4</b> in 1800s at $f_w = 0.9$ (ex = 460 nm, em = 627 nm, slit width: 5 nm, PMT Voltage: 600 V).-----           | 11 |
| 19. <b>Fig.S19.</b> Drosophila S2 cells incubated without Compound <b>4</b> .-----                                                                                           | 12 |
| 20. <b>Table S1</b> Average Diameter of Nanoaggregates with Different $f_w$ of compounds <b>1-4</b> -----                                                                    | 13 |

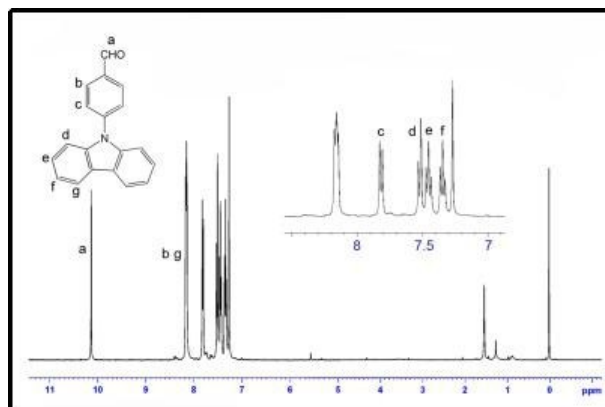

**Fig.S1** The <sup>1</sup>H-NMR spectra of **1a**

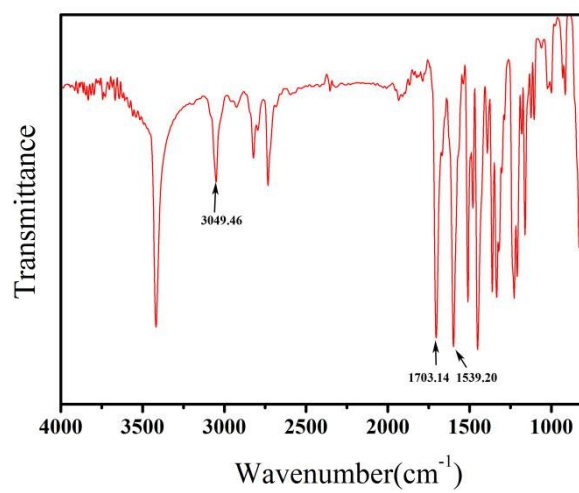

**Fig.S2.** FT-IR spectra of **1a**

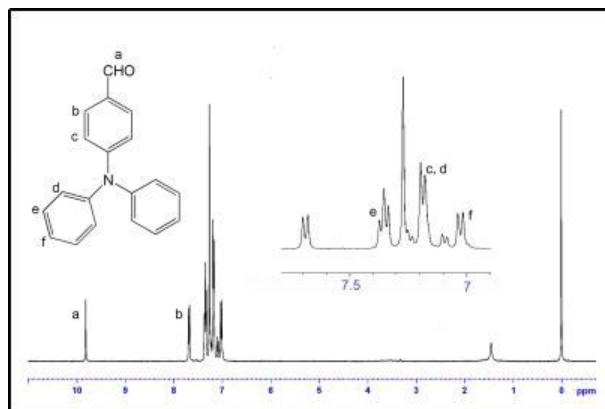

**Fig.S3** The <sup>1</sup>H-NMR spectra of **1b**

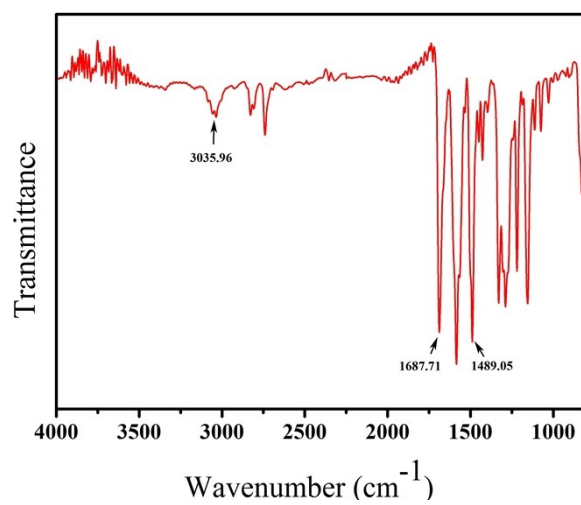

**Fig.S4.** FT-IR spectra of **1b**

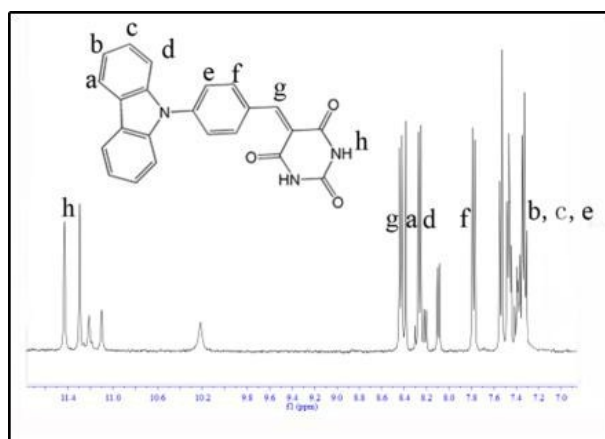

**Fig.S5** The <sup>1</sup>H-NMR spectra of **1**

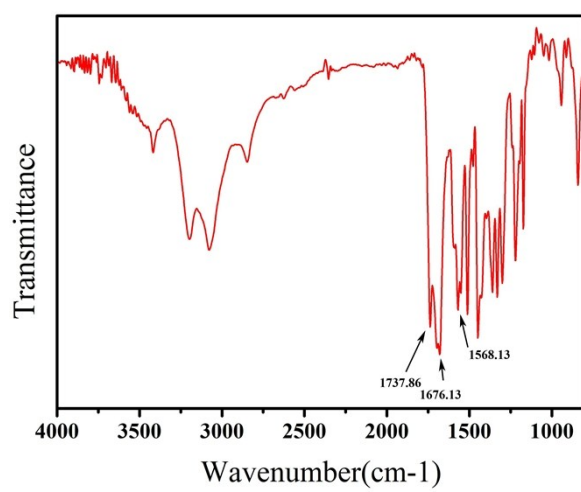

**Fig.S6.** FT-IR spectra of **1**

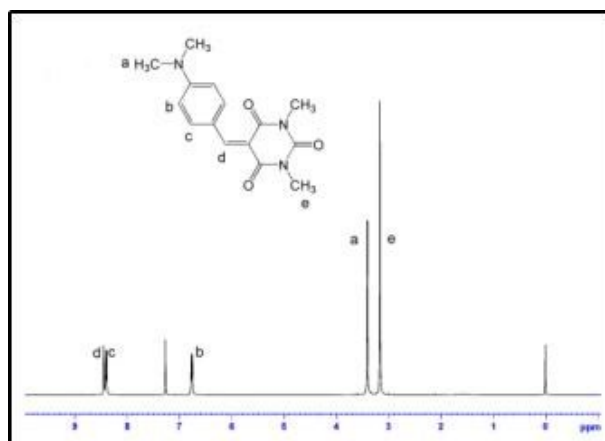

**Fig.S7.** The <sup>1</sup>H-NMR spectra of **2**

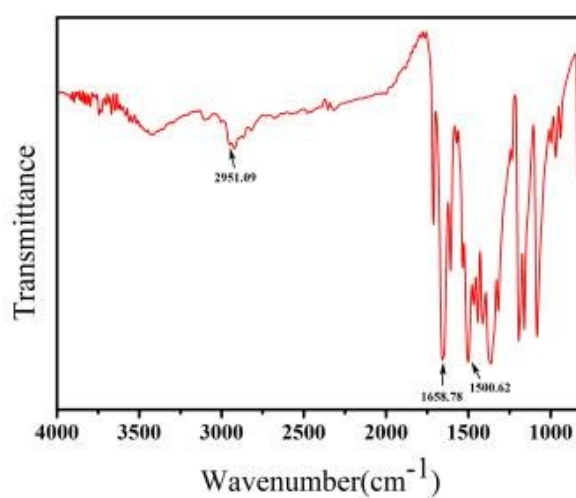

**Fig.S8.** FT-IR spectra of **2**

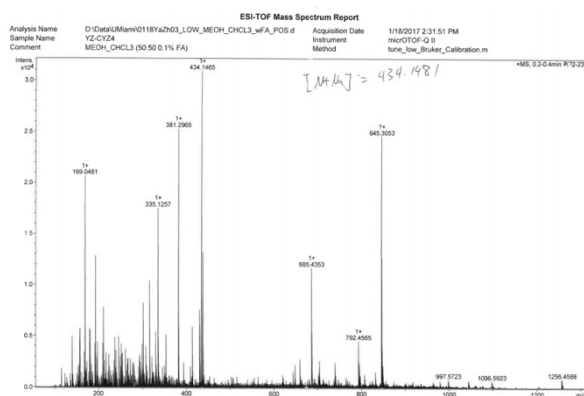

**Fig.S9.** ESIMS of **2**

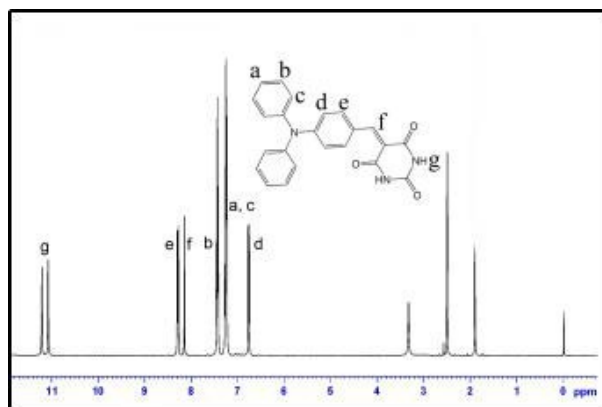

**Fig.S10.** The  $^1\text{H}$ -NMR spectra of **3**

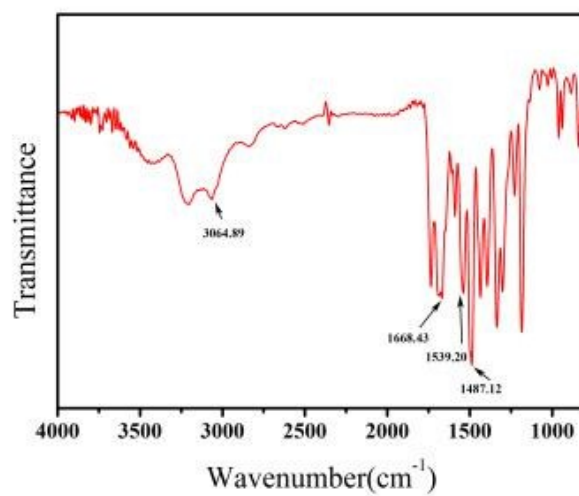

**Fig.S11.** FT-IR spectra of **3**

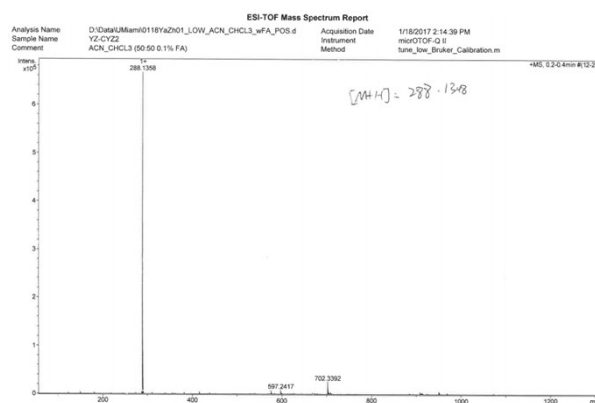

**Fig.S12.** ESIMS of **3**

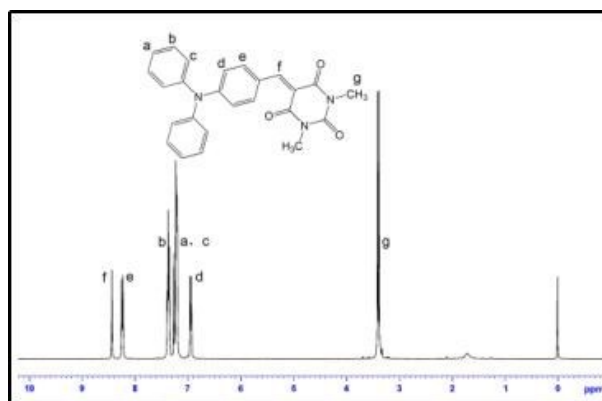

Fig. S13. The <sup>1</sup>H-NMR spectra of 4

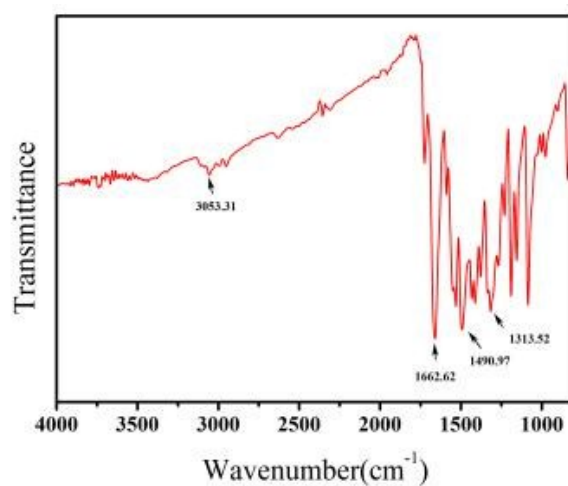

Fig. S14. FT-IR spectra of 4

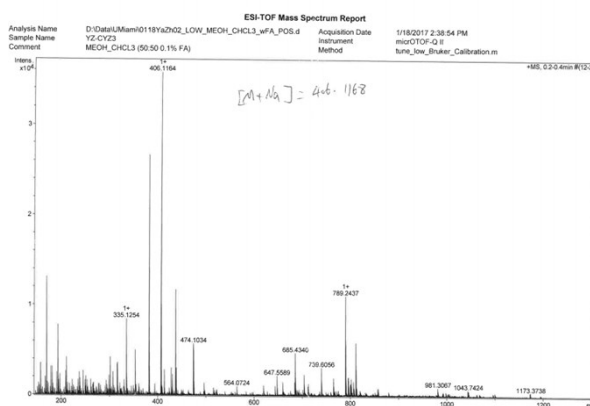

Fig. S15. ESIMS of 4



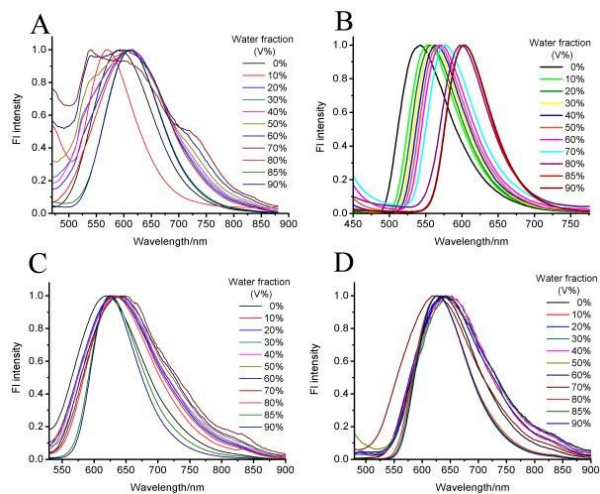

**Fig. S16.** Normalised emission spectra of compounds **1-4** in THF and THF/water mixture, 24  $\mu$ M concentration, room temperature, water fraction (V%)

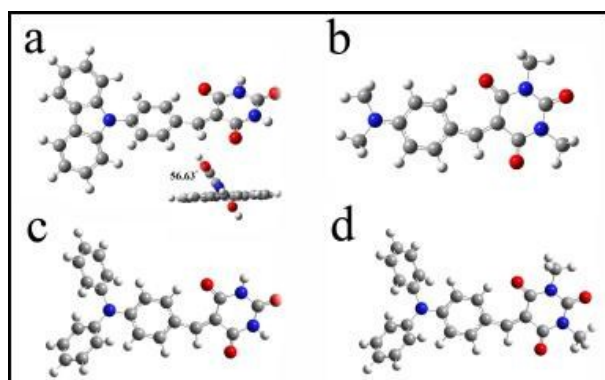

**Fig.S17.** Optimized geometric structures of a) **1**, b) **2**, c) **3** and d) **4**.

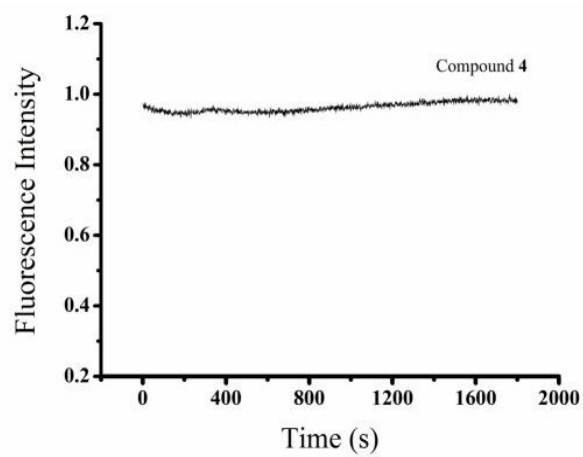

**Fig.S18.** The time scanning spectra of Compound 4 in 1800s at  $f_w = 0.9$  ( ex = 460 nm, em = 627 nm, slit width: 5 nm, PMT Voltage: 600 V).

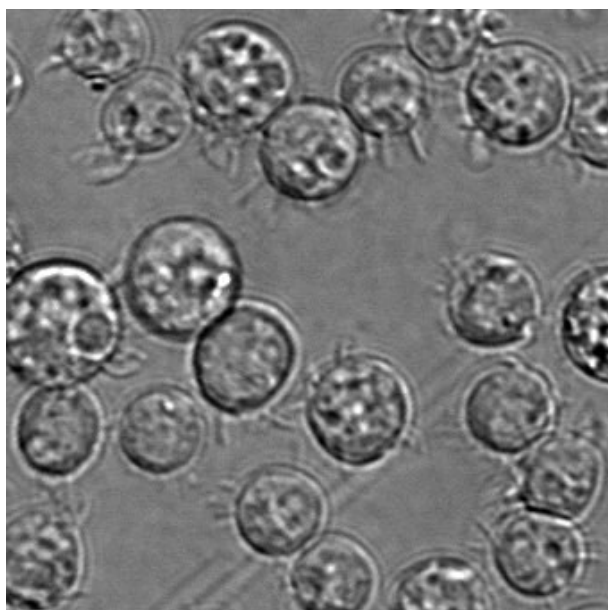

**Fig.S19.** Drosophila S2 cells incubated without Compound 4.

**Table S1** Average Diameter of Nanoaggregates with Different  $f_w$  of compounds **1-4**.

|                     | <b>1</b> | <b>2</b> | <b>3</b> | <b>4</b> |
|---------------------|----------|----------|----------|----------|
| $D_{f_w=80\%}$ (nm) | 533.8    | 873.3    | 461.6    | 945.2    |
| $D_{f_w=90\%}$ (nm) | 394.2    | 229.3    | 382.4    | 346.0    |
